# Supplementary material
Source: publisher figshare collection journal article supplement (https://gsapubs.figshare.com/ndownloader/files/37477324)
Supplement: Supplementary file 1 [file 37477324]

## Sheet: Readme
Supplementary Tables
Table S1 The chemical composition of the dissolved load of rivers in the Xining and Linxia Basins
Table S2 87Sr/86Sr ratios of acetic acid leachates of various sediments in the Xining and Qaidam Basins
Table S3 87Sr/86Sr ratios of acetic acid leachates of carbonate bedrocks and pebbles in the NE Tibetan Plateau
Table S4 87Sr/86Sr ratios of carbonate-free fraction of river/lake sediments in the Xining and Qaidam Basins
Table S5 87Sr/86Sr ratios of water and acetic acid leachates of the lower HLD section sediments in the Linxia Basin
Table S6 87Sr/86Sr ratios of water and acetic acid leachates of the XJ section sediments in the Xining Basin
Table S7 87Sr/86Sr ratios of water and acetic acid leachates of the GJS section sediments in the Xining Basin
Table S8 87Sr/86Sr ratios of acetic acid leachates of the LMS section sediments in the Tianshui Basin
Table S9 Nd isotopes of carbonate-free sediments of the GJS section in the Xining Basin
Table S10 87Sr/86Sr distribution of various waters in North China and Mongolia
Table S11 87Sr/86Sr distribution of water-soluble salts in surface sediments in North China
Table S12 87Sr/86Sr distribution of carbonates in surface sediments and carbonate bedrocks in North China
Table S13 87Sr/86Sr distribution of decarbonated fraction (silicate) of surface sediments in North China and Mongolia
Table S14 AFT central age distribution of bedrock around the Qilian Shan and adjacent regions
Table S15 Detrital AFT P1 age and lag time for Cenozoic sediments in the basins surrounding the Qilian Shan
Table S16 87Sr/86Sr distribution of various waters around the Tibetan Plateau
Supplementary References
Blayney, T., Dupont‐Nivet, G., Najman, Y., Proust, J. N., Meijer, N., Roperch, P., Sobel, E., Millar, I., Guo, Z., 2019. Tectonic evolution of the Pamir recorded in the Western Tarim Basin (China): Sedimentologic and magnetostratigraphic analyses of the Aertashi section. Tectonics 38(2), 492-515.
Basu, A.R., Jacobsen, S.B., Poreda, R.J., Dowling, C.B., Aggarwal, P.K., 2001. Large groundwater strontium flux to the oceans from the Bengal basin and the marine strontium isotope record.Science 293, 1470-1473.
Bickle, M.J., Bunbury, J., Chapman, H.J., Harris, N.B.W., Fairchild, I.J., Ahmad, T., 2003. Fluxes of Sr into the headwaters of the Ganges. Geochimica et Cosmochimica Acta 67, 2567 2584.
Bu, H. M., Song, X. F., Zhang, Q. F., Burford, M. A.., 2016. Strontium concentrations and isotope ratios in a forest-river system in the South Qinling Mts. China. Water Research 93(93), 91-97.
Chapman, H., Bickle, M., Thaw, S.H., Thiam, H.N., 2015. Chemical fluxes from time series sampling of the Irrawaddy and Salween Rivers. Myanmar. Chemical Geology 401, 15 27.
Chen, J., Li, G., Yang, J., Rao, W., Lu, H., Balsam, W., Sun, Y., Ji, J. 2007. Nd and Sr isotopic characteristics of Chinese deserts: implications for the provenances of Asian dust. Geochimica et Cosmochimica Acta 71(15), 3904-3914.
Chetelat, B., Liu, C.Q., Zhao, Z.Q., Wang, Q.L., Li, S.L., Li, J., Wang. B.L., 2008. Geochemistry of the dissolved load of the Changjiang Basin rivers: Anthropogenic impacts and chemical weathering. Geochimica et Cosmochimica Acta 72, 4254-4277.
Deng, Y.M., Wang, Y.X., Ma, T., 2009. Isotope and minor element geochemistry of high arsenic groundwater from Hangjinhouqi, the Hetao Plain, Inner Mongolia. Applied Geochemistry 24, 587-599.
Ding, T., Gao, J., Tian, S., Wang, H., Li, M., Wang, C., Luo, X., Hang, D., 2016. Chemical and isotopic characters of the water and suspended particulate materials in the Yellow River and their geological and environmental implications. Acta Geologica Sinica 90, 285 351
Du, D.D., Zhang, C.J., Mughal, M.S., Wang, X.Y., Blaise, D., Gao, J.P., Yuan, M., Luo, X.R., 2018. Detrital apatite fission track constraints on Cenozoic tectonic evolution of the northeastern Qinghai-Tibet Plateau, China: Evidence from Cenozoic strata in Lulehe section, Northern Qaidam Basin. Journal of Mountain Science 15(3), 532-547.
Edmunds, W., Ma, J., Aeschbachhertig, W., Kipfer, R., Darbyshire, D., 2006. Groundwater recharge history and hydrogeochemical evolution in the Minqin basin, north west China. Applied Geochemistry 21(12), 2148-2170.
Evans, M.J., Derry, L.A., France-Lanord, C., 2004. Geothermal fluxes of alkalinity in the Narayani river system of central Nepal. Geochemistry, Geophysics, Geosystems 5. https://doi.org/10.1029/2004GC000719
Fan, Q., Lowenstein, T.K., Wei, H., Yuan, Q., Qin, Z., Shan, F., Ma, H., 2018. Sr isotope and major ion compositional evidence for formation of Qarhan Salt Lake, western China. Chemical Geology 497, 128-145.
Fan, Y.X., Chen, F.H., Wei, G.X., Madsen, D.B., Oviatt, C.G., Zhao, H., Chun, X., Yang, L.P., Fan, T.L., Li, G.Q., 2010. Potential water sources for Late Quaternary Megalake Jilantai-Hetao, China, inferred from mollusk shell 87Sr/86Sr ratios. Journal of Paleolimnology 43, 577-587.
Galy, A., France-Lanord, C., Derry, L.A., 1999. The strontium isotopic budget of Himalayan Rivers in Nepal and Bangladesh. Geochimica et Cosmochimica Acta 63, 1905-1925.
Gao, X.B., Wang, Y.X., Wu, P.L., Guo, Q.H., 2010. Trace elements and environmental isotopes as tracers of surface water–groundwater interaction: a case study at Xin’an karst water system, Shanxi Province, Northern China. Environmental Earth Sciences 59, 1223-1234.
George, A.D., Marshallsea, S.J., Wyrwoll, K.H., Jie, C., Yanchou, L., 2001. Miocene cooling in the northern Qilian Shan, northeastern margin of the Tibetan Plateau, revealed by apatite fission-track and vitrinite-reflectance analysis. Geology 29(10), 939-942.
Guo, Q.H., Wang, Y.X., Liu, W., 2010. O, H, and Sr isotope evidences of mixing processes in two geothermal fluid reservoirs at Yangbajing, Tibet, China. Environmental Earth Sciences 59, 1589-1597.
Guo, Z., Lu, J., Zhang, Z., 2009. Cenozoic exhumation and thrusting in the northern Qilian Shan, northeastern margin of the Tibetan Plateau: Constraints from sedimentological and apatite fission‐track data. Acta Geologica Sinica‐English Edition 83(3), 562-579.
Han, D., Xing, L., Jin, M., Currell, M. J., Ying, H., Song, X., 2009. Hydrogeochemical indicators of groundwater flow systems in the Yangwu river alluvial fan, Xinzhou basin, Shanxi, China. Environmental Management, 44(2), 243-255.
Han, G.L., Liu, C.Q., 2004. Water geochemistry controlled by carbonate dissolution: a study of the river waters draining karst-dominated terrain, Guizhou Province, China. Chemical Geology 204, 1-21.
Han, G.L., Tang, Y., Xu, Z.F., 2010. Fluvial geochemistry of rivers draining karst terrain in Southwest China. Journal of Asian Earth Sciences 38, 65-75.
Han, Y., Huh, Y., 2009. A geochemical reconnaissance of the duman (Tumen) river and the hot springs of Mt. Baekdu (Changbai): weathering of volcanic rocks in mid-latitude setting. Chemical Geology, 264(1-4), 162-172.
He, P., Song, C., Wang, Y., Chen, L., Chang, P., Wang, Q., Ren, B., 2017. Cenozoic exhumation in the Qilian Shan, northeastern Tibetan Plateau: evidence from detrital fission track thermochronology in the Jiuquan Basin. Journal of Geophysical Research: Solid Earth 122(8), 6910-6927.
He, P., Song, C., Wang, Y., Meng, Q., Chen, L., Yao, L., Huang, R., Feng, W., Chen, S., 2018. Cenozoic deformation history of the Qilian Shan (northeastern Tibetan Plateau) constrained by detrital apatite fission-track thermochronology in the northeastern Qaidam Basin. Tectonophysics 749, 1-11.
He, P., Song, C., Wang, Y., Meng, Q., Wang, D., Feng, Y., Chen, K., Feng, W., 2020. Early Cenozoic exhumation in the Qilian Shan, northeastern margin of the Tibetan Plateau: Insights from detrital apatite fission track thermochronology. Terra Nova 32(6), 415-424.
He, P., Song, C., Wang, Y., Wang, D., Chen, L., Meng, Q., Fang, X., 2021. Early Cenozoic activated deformation in the Qilian Shan, northeastern Tibetan Plateau: Insights from detrital apatite fission‐track analysis. Basin Research 33(3), 1731-1748.
Jacobson, A.D., 2004. Has the atmospheric supply of dissolved calcite dust to seawater influenced the evolution of marine 87Sr/86Sr ratios over the past 2.5 million years?. Geochemistry, Geophysics, Geosystems 5(12).https://doi.org/10.1029/2004GC000750
Jian, X., Guan, P., Zhang, W., Liang, H., Feng, F., Fu, L., 2018. Late Cretaceous to early Eocene deformation in the northern Tibetan Plateau: Detrital apatite fission track evidence from northern Qaidam basin. Gondwana Research 60, 94-104.
Jiang, Y.B., Ji, H.B., 2011. Sr fluxes and 87Sr/86Sr characterization of river waters from a karstic versus granitic watershed in the Yangtze River. Journal of Geochemical Exploration 110, 202-215.
Jiang, Y.J., Wu, Y.X., Yuan, D.X., 2009. Human impacts on karst groundwater contamination deduced by coupled nitrogen with strontium isotopes in the Nandong Underground River System in Yunan, China. Environmental Science & Technology 43, 7676-7683.
Jin, Z., West, A.J., Zhang, F., An, Z., Hilton, R.G., Yu, J., Wang, J., Li, G., Deng, L., Wang, X., 2016.Seismically enhanced solute fluxes in the Yangtze River headwaters following the A.D. 2008 Wenchuan earthquake. Geology 44, 47 50.
Jin, Z.D., Wang, S.M., Zhang, F., Shi, Y.W., 2010. Weathering, Sr fluxes, and controls on water chemistry in the Lake Qinghai catchment, NE Tibetan Plateau. Earth Surface Processes and Landforms 35, 1057-1070.
Jin, Z.D., You, C.F., Yu, J.M., Wu, L.L., Zhang, F., Liu, H.C., 2011. Seasonal contributions of catchment weathering and eolian dust to river water chemistry, northeastern Tibetan Plateau: Chemical and Sr isotopic constraints. Journal of Geophysical Research 116, F04006.
Jin, Z.D., Yu, J.M., Wang, S.M., Zhang, F., Shi, Y.W., You, C.F., 2009. Constraints on water chemistry by chemical weathering in the Lake Qinghai catchment, northeastern Tibetan Plateau (China): clues from Sr and its isotopic geochemistry. Hydrogeology Journal 17, 2037-2048.
Jolivet, M., Brunel, M., Seward, D., Xu, Z., Yang, J., Roger, F., Tapponnier, P., Malavieille, J., Arnaud, N., Wu, C., 2001. Mesozoic and Cenozoic tectonics of the northern edge of the Tibetan plateau: fission-track constraints. Tectonophysics, 343(1-2), 111-134.
Lang, Y.C., Liu, C.Q., Zhao, Z.Q., Li, S.L., Han, G.L., 2006. Geochemistry of surface and ground water in Guiyang, China: Water/rock interaction and pollution in a karst hydrological system. Applied Geochemistry 21, 887-903.
Lease, R.O., Burbank, D.W., Clark, M.K., Farley, K.A., Zheng, D., Zhang, H., 2011. Middle Miocene reorganization of deformation along the northeastern Tibetan Plateau. Geology 39(4), 359-362.
Li, B., Chen, X., Zuza, A.V., Hu, D., Ding, W., Huang, P., Xu, S., 2019. Cenozoic cooling history of the North Qilian Shan, northern Tibetan Plateau, and the initiation of the Haiyuan fault: Constraints from apatite-and zircon-fission track thermochronology. Tectonophysics 751, 109-124.
Li, G., Chen, J., Ji, J., Yang, J., Conway, T.M., 2009. Natural and anthropogenic sources of East Asian dust. Geology 37(8), 727-730.
Li, J., Zhang, Z., Zhao, Y., Pei, J., Tang, W., Li, K., 2016. Detrital apatite fission track analyses of the Subei basin: implications for basin-range structure of the northern Tibetan Plateau. International Geology Review 59(2), 204-218.
Li, J.S., Ling, Z.Y., Shan, F.S., Chen, L., Han, J.J., Wang, J.P., 2019. Hydrogen, oxygen and strontium isotopes'indication on origin of lithium-rich salt lakes in eastern Kunlun Mountains. Wetland Science 17, 391-398 (In Chinese).
Li, L. , Zhang, F. , Jin, Z. , Xiao, J., Xu, Y., 2020. Riverine Mg isotopes response to glacial weathering within the Muztag catchment of the eastern Pamir Plateau. Applied Geochemistry 118, 104626.
Li, Q., Pan, B., Hu, X., Hu, Z., Li, F., Yang, S., 2013. Apatite fission track constraints on the pattern of faulting in the north Qilian Mountain. Journal of Earth Science 24(4), 569-578.
Li, X.D., Liu, C.Q., Harue, M., Li, S.L., Liu, X.L., 2010. The use of environmental isotopic (C, Sr, S) and hydrochemical tracers to characterize anthropogenic effects on karst groundwater quality: A case study of the Shuicheng Basin, SW China. Applied Geochemistry 25, 1924-1936.
Lin, X., Chen, H., Wyrwoll, K.H., Batt, G.E., Liao, L., Xiao, J., 2011. The uplift history of the Haiyuan-Liupan Shan region northeast of the present Tibetan Plateau: integrated constraint from stratigraphy and thermochronology. The Journal of Geology 119(4), 372-393.
Lin, X., Tian, Y., Donelick, R. A., Liu-Zeng, J., Cleber, S. J., Wu, Q., Li, Z., 2019. Mesozoic and Cenozoic tectonics of the northeastern edge of the Tibetan plateau: Evidence from modern river detrital apatite fission-track age constraints. Journal of Asian Earth Sciences 170, 84-95.
Lin, X., Zheng, D., Sun, J., Windley, B. F., Tian, Z., Gong, Z., Jia, Y., 2015. Detrital apatite fission track evidence for provenance change in the Subei Basin and implications for the tectonic uplift of the Danghe Nan Shan (NW China) since the mid-Miocene. Journal of Asian Earth Sciences 111, 302-311.
Lin, Y.J., Zheng, M.P., Ye, C.Y., Power, I.M., 2019. Rare earth element and strontium isotope geochemistry in Dujiali Lake, central Qinghai-Tibet Plateau, China: Implications for the origin of hydromagnesite deposits. Geochemistry 79, 337-346.
Liu, J., 2008. Hydrochemical and strontium isotopic characteristics of river water in a small subtropical watershed and their indications for weathering. Master Thesis, Captital Normal University (In Chinese).
Liu, W., Jiang, H., Shi, C., Zhao, T., Liang, C., Hu, J., Xu, Z., 2016. Chemical and strontium isotopic characteristics of the rivers around the Badain Jaran Desert, northwest China: implication of river solute origin and chemical weathering. Environmental Earth Sciences 75
Liu, Y., Yang, Y., Song, B., Galy, A., Zhang, F., Jin, Z., Zhang, G., Ye, C., Fang, X., 2022. Hydrothermal systems with radiogenic Sr in the North Qaidam ultrahigh-pressure metamorphic belt, NE Tibetan Plateau and implications for regional dissolved Sr budget. Applied Geochemistry, 138, 105214.
Luo, C., Zheng, H.B., Tada, R. Wu, W.H., Irino, T., Yang, S.Y., Saito, K., 2014. Tracing Sr isotopic composition in space and time across the Yangtze River basin. Chemical Geology 388, 59-70.
Ma, Z.Y., Li, X.C., Zheng, H.J., Li, J.B., Pei, B., Guo, S., Zhang, X.L., 2017. Origin and classification of geothermal water from Guanzhong Basin, NW China: Geochemical and isotopic approach. Journal of Earth Science 28, 719-728.
Min, M.Z., Peng, X.J., Zhou, X.L., Qiao, H.M., Wang, J.P., Zhang, L., 2007. Hydrochemistry and isotope compositions of groundwater from the Shihongtan sandstone-hosted uranium deposit, Xinjiang, NW China. Journal of Geochemical Exploration 93, 91-108.
Moon, S., Huh, Y., Qin, J.H., van Pho, N., 2007. Chemical weathering in the Hong (Red) River basin: Rates of silicate weathering and their controlling factors. Geochimica et Cosmochimica Acta 71,1411-1430.
Nakano, T., Yokoo, Y., Nishikawa, M., Koyanagi, H., 2004. Regional Sr-Nd isotopic ratios of soil minerals in northern China as Asian dust fingerprints. Atmospheric Environment 38(19), 3061-3067.
Niu, X.S., Liu, X.F., Chen, W.X., 2014. Hydrochemical characteristics and origin for salt springs water in Dogai coring area of North Qiangtang Basin, Tibet. Acta Geologica Sinica 88, 1003-1010 (In Chinese).
Noh, H.J., Huh, Y., Qin, J.H., Ellis, A., 2009. Chemical weathering in the Three Rivers region of Eastern Tibet. Geochimica et Cosmochimica Acta 73, 1857-1877.
Pan, B., Li, Q., Hu, X., Geng, H., Liu, Z., Jiang, S., Yuan, W., 2013. Cretaceous and Cenozoic cooling history of the eastern Qilian Shan, north‐eastern margin of the Tibetan Plateau: evidence from apatite fission‐track analysis. Terra Nova 25(6), 431-438.
Pang, J., Yu, J., Zheng, D., Wang, W., Ma, Y., Wang, Y., Li, C., Li, Y., Wang, Y., 2019b. Neogene expansion of the Qilian Shan, north Tibet: Implications for the dynamic evolution of the Tibetan Plateau. Tectonics 38(3), 1018-1032.
Pang, J., Yu, J., Zheng, D., Wang, Y., Zhang, H., Li, C., Wang, W., Hao, Y., 2019a. Constraints of new apatite fission-track ages on the tectonic pattern and geomorphic development of the northern margin of the Tibetan Plateau. Journal of Asian Earth Sciences 181, 103909.
Qi, B., Hu, D., Yang, X., Zhang, Y., Tan, C., Zhang, P., Feng, C., 2016. Apatite fission track evidence for the Cretaceous–Cenozoic cooling history of the Qilian Shan (NW China) and for stepwise northeastward growth of the northeastern Tibetan Plateau since early Eocene. Journal of Asian Earth Sciences 124, 28-41.
Qin, D., Zhao, Z., Guo, Y., Liu, W. , Haji, M., Wang, X., Xin, B., Li, Y., Yang, Y., 2017. Using hydrochemical, stable isotope, and river water recharge data to identify groundwater flow paths in a deeply buried karst system. Hydrological Processes 31(24), 4297-4314.
Rao, W., Chen, J., Yang, J., Ji, J., Zhang, G., 2009. Sr isotopic and elemental characteristics of calcites in the Chinese deserts: implications for eolian Sr transport and seawater Sr evolution. Geochimica et Cosmochimica Acta 73(19), 5600-5618.
Rao, W.B., J, K., Jiang, S.Y., Tan, H.B., Han, L.F., Tang, Q.Y., 2015. Chemical and strontium isotopic characteristics of shallow groundwater in the Ordos Desert Plateau, North China: Implications for the dissolved Sr source and water–rock interactions.Geochemistry 75, 365-374.
Singh, S.K., Kumar, A., France-Lanord, C., 2006. Sr and 87Sr/86Sr in waters and sediments of the Brahmaputra river system: silicate weathering, CO2 consumption and Sr flux. Chemical Geology 234, 308 320.
Song, B., Yang, Y., Yang, R., Galy, A.,Hou, Y., 2020. Miocene 87Sr/86Sr ratios of ostracods in the northern qaidam basin, ne tibetan plateau, and links with regional provenance, weathering and eolian input. Palaeogeography Palaeoclimatology Palaeoecology 552, 109775.
Tan, H., Rao, W., Chen, J., Su, Z., Sun, X., Liu, X., 2009. Chemical and isotopic approach to groundwater cycle in western Qaidam Basin, China. Chinese Geographical Science 19(4), 357-364.
Tan, H., Rao, W., Ma, H., Chen, J., Li, T., 2011. Hydrogen, oxygen, helium and strontium isotopic constraints on the formation of oilfield waters in the western Qaidam Basin, China. Journal of Asian Earth Scinces 40, 651-660.
Tang, C.G., Liu, C.Q., 2011. Characteristics and driving factors of surface water chemistry of Wujiang watershed. Environmental Earth Sciences 64, 1445-1453.
Tong, X.X., Ma, W.M., Sun, X.Y., 2017. Characteristic and environmental significance of strontium isotope in glacial meltwater of the Tashkurgan area in Pamirs, Xinjiang. Environmental Chemistry 36, 830-838 (In Chinese).
Wang, W., Zhang, P., Pang, J., Garzione, C., Zhang, H., Liu, C., Zheng, D., Zheng, W., Yu, J. 2016. The Cenozoic growth of the Qilian Shan in the northeastern Tibetan Plateau: A sedimentary archive from the Jiuxi Basin. Journal of Geophysical Research: Solid Earth 121(4), 2235-2257.
Wang, X., Deng, L., Zattin, M., Ji, M., Li, J., 2017. Palaeogene growth of the northeastern Tibetan Plateau: detrital fission track and sedimentary analysis of the Lanzhou basin, NW China. Journal of Asian Earth Sciences 147, 322-331.
Wang, X., Song, C., Zattin, M., He, P., Song, A., Li, J., Wang, Q., 2016. Cenozoic pulsed deformation history of northeastern Tibetan Plateau reconstructed from fission-track thermochronology. Tectonophysics 672, 212-227.
Wang, X., Tang, Z., 2020. The first large-scale bioavailable Sr isotope map of China and its implication for provenance studies. Earth-Science Reviews 210, 103353
Wang, X., Zattin, M., Li, J., Song, C., Peng, T., Liu, S., Liu, B., 2011. Eocene to Pliocene exhumation history of the Tianshui-Huicheng region determined by Apatite fission track thermochronology: Implications for evolution of the northeastern Tibetan Plateau margin. Journal of Asian Earth Sciences 42(1-2), 97-110.
Wang, X.Y., Tang, Z.H., Dong, X.X., 2018. Distribution of strontium isotopes in river waters across the Tarim Basin: a map for migration studies. Journal of the Geological Society 175, 967-973.
Wu, L.L., Huh, Y., Qin, J.H., Du, G., van Der Lee, S., 2005. Chemical weathering in the Upper Huang He (Yellow River) draining the eastern Qinghai-Tibet Plateau. Geochimica et Cosmochimica Acta 69, 5279-5294.
Wu, W., Xu, S., Yang, J., Yin, H., Lu, H., Zhang, K., 2010. Isotopic characteristics of river sediments on the Tibetan Plateau. Chemical Geology 269(3-4), 406-413.
Wu, W.H., Xu, S.J., Yang, J.D., Yin, H.W., Tao, X.C., 2009b. Sr fluxes and isotopic compositions in the headwaters of the Yangtze River, Tongtian River and Jinsha River originating from the Qinghai–Tibet Plateau. Chemical Geology 260, 63-72.
Wu, W.H., Yang, J.D., Xu, S.J., Li, G.J., Yin, H.W., Tao, X.C., 2009a. Sr fluxes and isotopic compositions of the eleven rivers originating from the Qinghai-Tibet Plateau and their contributions to 87Sr/86Sr evolution of seawater. Science China Series D: Earth Sciences 52, 1059-1067.
Xiao, J., Jin, Z.D., Zhang, F., 2013. Geochemical and isotopic characteristics of shallow groundwater within the Lake Qinghai catchment, NE Tibetan Plateau. Quaternary International 313-314, 62-73.
Xu, Z.F., Liu, C.Q., 2007. Chemical weathering in the upper reaches of Xijiang River draining the Yunnan–Guizhou Plateau, Southwest China. Chemical Geology 239, 83-95.
Xu, Z.F., Liu, C.Q., 2010. Water geochemistry of the Xijiang basin rivers, South China: Chemical weathering and CO2 consumption. Applied Geochemistry 25, 1603-1614.
Xu, Z.F., Shi, C., Tang, Y., Han, H.Y., 2011b. Chemical and strontium isotopic compositions of the Hanjiang Basin Rivers in China: Anthropogenic impacts and chemical weathering. Aquatic Geochemistry 17, 243-264.
Yang, Y., Galy, A., Fang, X., Yang, R., Zhang, W., Zan, J., 2017. Eolian dust forcing of river chemistry on the northeastern Tibetan Plateau since 8 Ma. Earth and Planetary Science Letters 464 200-210.
Yoon J. Huh, Y., Lee, I., Moon, S., Noh, H., Qin, J.H., 2008. Weathering Processes in the Min Jiang: Major Elements, 87Sr/86Sr; δ34SSO4; and δ18OSO4. Aquatic Geochemistry 14, 147-170.
Yu, J., Pang, J., Wang, Y., Zheng, D., Liu, C., Wang, W., Li, Y., Li, C., Xiao, L., 2019a. Mid-Miocene uplift of the northern Qilian Shan as a result of the northward growth of the northern Tibetan Plateau. Geosphere 15(2), 423-432.
Yu, J., Zheng, D., Pang, J., Wang, Y., Fox, M., Vermeesch, P., Li, C., Xiao, L., Hao, Y., Wang, Y., 2019b. Miocene range growth along the Altyn Tagh Fault: Insights from apatite fission track and (U‐Th)/He thermochronometry in the western Danghenan Shan, China. Journal of Geophysical Research: Solid Earth 124(8), 9433-9453.
Zhang, F., Jin, Z.D., Li, F.C., Yu, J.M., You, C.F., Zhou, L., 2013. The dominance of loess weathering on water and sediment chemistry within the Daihai Lake catchment, northeastern Chinese Loess Plateau. Applied Geochemistry 35, 51-63.
Zhang, J., Takahashi, K., Wushiki, H., Yabuki, S., Xiong, J.M., Masuda, A., 1995. Water geochemistry of the rivers around the Taklimakan Desert (NW China): crustal weathering and evaporation processes in arid land. Chemical Geology 119, 225-237.
Zhang, J., Wang, Y., Zhang, B., Zhao, H., 2015. Evolution of the NE Qinghai–Tibetan Plateau, constrained by the apatite fission track ages of the mountain ranges around the Xining Basin in NW China. Journal of Asian Earth Sciences 97, 10-23.
Zhang, X., Xu, Z.F., Liu, W.J., Moon, S., Zhao, T., Zhou, X.D., Zhang, J.Y., Wu, Y., Jiang, H., Zhou, L., 2019. Hydro-Geochemical and Sr isotope characteristics of the Yalong River Basin, Eastern Tibetan Plateau: Implications for chemical weathering and controlling factors. Geochem. Geophys. Geosyst. 20, 1221-1239.
Zhao, J.C., Li, W.P., Peng, J.H., Liu, C.Q., Dupre, B., Gaillarde, J., Hu, J.S., Yin, Z.Y., Geng, D.Q., 2007. Origin and environmental significance of major elements and Sr isotope rations in rivers originating from Tanggula Mountains. Geoscience 21, 591-599 (In Chinese).
Zhao, W., Sun, Y., Balsam, W., Lu, H., Liu, L., Chen, J., Ji, J., 2014. Hf-Nd isotopic variability in mineral dust from Chinese and Mongolian deserts: implications for sources and dispersal. Scientific Reports 4(1), 1-6.
Zhao, W., Sun, Y., Balsam, W., Zeng, L., Lu, H., Otgonbayar, K., Ji, J., 2015. Clay‐sized Hf‐Nd‐Sr isotopic composition of Mongolian dust as a fingerprint for regional to hemispherical transport. Geophysical Research Letters 42(13), 5661-5669.
Zheng, D., Wang, W., Wan, J., Yuan, D., Liu, C., Zheng, W., Zhang, H., Pang, J., Zhang, P., 2017. Progressive northward growth of the northern Qilian Shan–Hexi Corridor (northeastern Tibet) during the Cenozoic. Lithosphere 9(3), 408-416.
Zhou, H.Y., Feng, Y.X., Zhao, J.X., Shen, C.C., You., C.F., Lin, Y., 2009. Deglacial variations of Sr and 87Sr/86Sr ratio recorded by a stalagmite from Central China and their association with past climate and environment. Chemical Geology 268, 233-247.
Zou, J.Y., Yang, Y.S., Zhang, H.Y., 2018. Sr isotope fingerprinting of multiple water-source characterizations and its environmental implications in a complex lake-groundwater system, Wudalianchi, Northeast China. Chemosphere 212, 1095-1102.

## Sheet: S 1
Table S1 The chemical composition of the dissolved load of rivers in the Xining and Linxia Basins (including Xining Basin data in Fig. 4E)
Region	Location	Sample ID	Latitude	Longitude	Ca	Mg	K	Na	Cl	SO4	Sr	87Sr/86Sr	1σ (×10-6)	Source
					mg/L	mg/L	mg/L	mg/L	mg/L	mg/L	μg/L
Xining Basin	N Tribitary@ Huangshui River	19QLR06	37.2389	101.009	75.4738	25.4763	2.4196	16.1103	6.2045	68.8568	520.198	0.713604	8	This study
Xining Basin	Huangshui River main stream	19R05	36.3334	102.825	72.0313	22.4995	4.29336	59.5535	70.527	129.825	756.9	0.712467	7	This study
Xining Basin	Huangshui River main stream	19R06	36.5639	101.901	70.6346	18.2268	4.96977	59.6025	81.0303	119.523	551.841	0.713095	9	This study
Xining Basin	Huangshui River main stream	19R07	36.3358	102.872	58.9063	20.6228	2.56582	25.175	21.3963	93.7551	446.536	0.713265	9	This study
Xining Basin	N Tribitary@ Huangshui River	19R08	36.3516	102.832	54.6925	20.2972	1.91106	13.6654	7.1651	71.4319	359.233	0.713691	7	This study
Xining Basin	N Tribitary@ Huangshui River	19R09	37.0675	101.574	43.074	9.06124	1.61817	7.36525	3.8374	42.8194	197.794	0.715706	10	This study
Xining Basin	S Tribitary@ Huangshui River	19R10	36.4539	101.602	55.577	28.7749	2.27717	9.55959	5.7228	45.8079	279.151	0.709866	8	This study
Xining Basin	N Tribitary@ Huangshui River	19R11	37.0817	101.403	36.8157	4.99253	1.21818	5.58466	3.5815	25.5019	166.377	0.720701	9	This study
Xining Basin	N Tribitary@ Huangshui River	19R12	36.7837	101.928	54.0453	17.7864	1.93247	11.1854	9.195	46.2568	363.392	0.713756	8	This study
Xining Basin	N Tribitary@ Huangshui River	19R13	36.8586	101.951	52.3783	19.9026	1.40941	8.22373	6.01	61.9626	435.597	0.714482	9	This study
Xining Basin	N Tribitary@ Huangshui River	19R14	36.9865	101.879	47.5876	12.6675	1.20111	5.29779	4.0003	30.1485	233.948	0.714839	9	This study
Xining Basin	N Tribitary@ Huangshui River	19R15	36.978	101.9	59.3862	17.1014	1.54707	8.59366	5.4209	55.678	376.104	0.714859	10	This study
Linxia Basin	Daxia River	19R16	35.5147	103.112	53.2173	14.1853	2.0375	8.0775	4.9989	26.1428	503.113	0.710763	8	This study
Linxia Basin	Guangtong River	19R17	35.3925	103.321	60.8821	4.8803	2.0007	4.6069	3.6916	15.0391	168.345	0.710202	10	This study
Xining Basin	S Tribitary@ Huangshui River	19R50	36.438	102.037	70.3994	40.5896	2.7458	26.3276	21.4994	89.1983	442.621	0.710319	7	This study
Xining Basin	N Tribitary@ Huangshui River	19R51	36.5276	102.091	96.7519	29.3169	3.6448	44.5432	37.248	205.597	846.205	0.714625	7.5	This study
Xining Basin	S Tribitary@ Huangshui River	19R52	36.4535	102.411	62.1733	26.1112	3.1088	37.0764	32.9997	101.091	547.132	0.710606	11	This study
Xining Basin	N Tribitary@ Huangshui River	19R53	36.4891	102.419	58.1776	10.8868	2.5558	8.9025	7.5318	34.9631	219.76	0.713358	9.5	This study
Xining Basin	Huangshui River main stream	19R54	36.4722	102.423	86.8252	24.9756	6.0822	52.0148	44.7996	107.35	670.255	0.713335	11.5	This study
Xining Basin	S Tribitary@ Huangshui River	19R55	36.2715	102.786	83.9355	19.3736	3.2195	34.9405	21.0949	94.3624	1039.1	0.710308	9	This study
Xining Basin	S Tribitary@ Huangshui River	19R65	36.5181	101.879	77.4323	53.9033	3.6	69.2808	67.6354	221.035	1220.87	0.711165	5	This study

## Sheet: S 2
Table S2 87Sr/86Sr ratios of acetic acid leachates of various sediments in the Xining and Qaidam Basins (including Xining Basin data in Fig. 4F)
Region	Location	Sample ID	Type	Latitude	Longitude	87Sr/86Sr	1σ (×10-6)	Source
Xining Basin	Huangshui River main stream	19R05-B	modern river sediments	36.3334	102.825	0.712199	3.55928	This study
Xining Basin	N Tribitary@ Huangshui River	19R08-B	modern river sediments	36.3516	102.832	0.712479	3.63006	This study
Xining Basin	N Tribitary@ Huangshui River	19R09-B	modern river sediments	37.0675	101.574	0.718544	3.45744	This study
Xining Basin	S Tribitary@ Huangshui River	19R10-B	modern river sediments	36.4539	101.602	0.710464	3.63949	This study
Xining Basin	N Tribitary@ Huangshui River	19R11-B	modern river sediments	37.0817	101.403	0.729409	5.4923	This study
Xining Basin	N Tribitary@ Huangshui River	19R12-B	modern river sediments	36.7837	101.928	0.711875	4.81912	This study
Xining Basin	N Tribitary@ Huangshui River	19R14-B	modern river sediments	36.9865	101.879	0.715773	4.47911	This study
Xining Basin	S Tribitary@ Huangshui River	19R50-B	modern river sediments	36.438	102.037	0.711411	3.51875	This study
Xining Basin	N Tribitary@ Huangshui River	19R51-B	modern river sediments	36.5276	102.091	0.712276	4.64923	This study
Xining Basin	S Tribitary@ Huangshui River	19R52-B	modern river sediments	36.4535	102.411	0.712593	4.31169	This study
Xining Basin	N Tribitary@ Huangshui River	19R53-B	modern river sediments	36.4891	102.419	0.716852	3.10463	This study
Xining Basin	S Tribitary@ Huangshui River	19R55-B	modern river sediments	36.2715	102.786	0.710342	2.20976	This study
Qaidam Basin		17H01	modern-recent river sediments	38.8667	94.3698	0.712491	3.64812	This study
Qaidam Basin		18H05	modern-recent river sediments	38.9098	93.3938	0.712147	2.94487	This study
Qaidam Basin		18H06	modern-recent river sediments	38.9098	92.654	0.71141	4.52092	This study
Qaidam Basin		18H07	modern-recent river sediments	39.0334	94.1303	0.713245	3.01109	This study
Qaidam Basin		19H-01	modern-recent river sediments	36.2412	98.1053	0.711373	4.23117	This study
Qaidam Basin		19H-02	modern-recent river sediments	35.9138	97.9957	0.710127	2.32428	This study
Qaidam Basin		19H-03	modern-recent river sediments	36.0639	97.4567	0.714519	4.00664	This study
Qaidam Basin		19H-04	modern-recent river sediments	36.1516	97.1698	0.715104	5.93542	This study
Qaidam Basin		19H-05	modern-recent river sediments	36.3803	96.4119	0.711438	3.84319	This study
Qaidam Basin		19H-06	modern-recent river sediments	36.3269	95.2935	0.713741	3.64636	This study
Qaidam Basin		19H-07	modern-recent river sediments	36.4279	94.8559	0.710601	3.76162	This study
Qaidam Basin		19H-08	modern-recent river sediments	36.4468	94.3936	0.712283	5.22877	This study
Qaidam Basin		19H-09	modern-recent river sediments	36.9339	93.0002	0.711227	3.65112	This study
Qaidam Basin		19H-10	modern-recent river sediments	37.7818	91.7141	0.710484	5.28114	This study
Qaidam Basin		19H-11	modern-recent river sediments	38.3324	90.5543	0.711877	4.01388	This study
Qaidam Basin		19H-12	modern-recent river sediments	38.1306	90.239	0.711467	3.85058	This study
Qaidam Basin		19H-13	modern-recent river sediments	37.3491	96.925	0.714161	3.35193	This study
Qaidam Basin		19H-14	modern-recent river sediments	37.3367	97.3715	0.709648	2.37819	This study
Qaidam Basin		19R56-B	modern-recent river sediments	37.3367	97.3715	0.710983	3.7084	This study
Qaidam Basin		19R58-B	modern-recent river sediments	37.3367	97.3715	0.711442	4.77173	This study
Hala Lake		19R64-B	Lake sediments	37.3367	97.3715	0.711736	3.28272	This study
Qaidam Basin		QL-71	topsoil	37.1245	97.5922	0.711721	7.11795	This study
Qaidam Basin		QL-131	topsoil	37.4803	95.4368	0.713194	3.21576	This study
Qaidam Basin		QL-147	topsoil	37.4803	95.4368	0.711446	3.35572	This study
Qaidam Basin		QL-156	topsoil	36.589	94.0057	0.710916	5.30472	This study
Qaidam Basin		QL-177	topsoil	36.5728	94.1745	0.711232	8.26923	This study
Qaidam Basin		QL-186-1	topsoil	37.3645	92.444	0.711331	4.57598	This study
Qaidam Basin		QL-188	topsoil	37.6253	92.0661	0.711319	2.50703	This study
Qaidam Basin		QL-190	topsoil	37.7732	91.7271	0.710879	5.51647	This study
Qaidam Basin		QL-234	topsoil	38.1621	90.8498	0.710834	1.37447	This study
Qaidam Basin		QL-235	topsoil	38.1621	90.8498	0.711394	3.81702	This study
Qaidam Basin		QL-282	topsoil	38.0995	90.9842	0.711148	2.38502	This study
Qaidam Basin		QL-301	topsoil	38.8875	93.772	0.711233	0.911523	This study

## Sheet: S 3
Table S3 87Sr/86Sr ratios of acetic acid leachates of carbonate bedrocks and pebbles in the NE Tibetan Plateau (including Xining Basin data in Fig. 4G)
Region	Sample ID	Location	Type	Latitude	Longitude	87Sr/86Sr	1σ (×10-6)	Source
Qilian Shan	QL-036		bedrock (limestone/marble) in outcrop	38.4184	99.5312	0.708096	3.20839	This study
Qilian Shan	QL-037		bedrock (limestone/marble) in outcrop	38.439	99.5765	0.708443	3.99286	This study
Qilian Shan	QL-042		bedrock (limestone/marble) in outcrop	38.3185	99.2989	0.711621	3.25211	This study
Qilian Shan	QL-061		bedrock (limestone/marble) in outcrop	37.4079	98.823	0.708339	3.46907	This study
Qilian Shan	QL-062		bedrock (limestone/marble) in outcrop	37.4079	98.823	0.708174	4.2791	This study
Qilian Shan	QL-071		bedrock (limestone/marble) in outcrop	37.5205	97.4169	0.707181	5.21299	This study
Qilian Shan	QL-072		bedrock (limestone/marble) in outcrop	37.5114	97.4546	0.707621	3.67524	This study
Qilian Shan	QL-079		bedrock (limestone/marble) in outcrop	37.4882	97.3904	0.707846	4.72776	This study
Qilian Shan	QL-080		bedrock (limestone/marble) in outcrop	37.4643	95.3542	0.707741	3.25	This study
East Kunlun Shan	QL-106		bedrock (limestone/marble) in outcrop	35.8849	94.5287	0.707735	3.93223	This study
Qilian Shan	QL-161		bedrock (limestone/marble) in outcrop	39.3542	95.2678	0.710236	4.49138	This study
Qilian Shan	QL-174		bedrock (limestone/marble) in outcrop	39.4858	95.6591	0.71202	5.85107	This study
Qilian Shan	QL-175		bedrock (limestone/marble) in outcrop	39.4911	95.6684	0.706517	2.59043	This study
Qilian Shan	QL-184		bedrock (limestone/marble) in outcrop	39.3687	97.6495	0.713515	3.4854	This study
Qaidam Basin	19R58-L		River channel pebble (limestone/marble)	36.9784	98.5247	0.719337	4.69155	This study
Qaidam Basin	19R61-L		River channel pebble (limestone/marble)	37.8945	98.4108	0.708705	1.97618	This study
Xining Basin	19R08-L-1	N Tribitary@ Huangshui River	River channel pebble (limestone/marble)	36.3516	102.832	0.708269	4.32212	This study
Xining Basin	19R08-L-2	N Tribitary@ Huangshui River	River channel pebble (limestone/marble)	36.3516	102.832	0.709353	4.38186	This study
Xining Basin	19R10-L-1	S Tribitary@ Huangshui River	River channel pebble (limestone/marble)	36.4539	101.602	0.707582	5.00414	This study
Xining Basin	19R10-L-2	S Tribitary@ Huangshui River	River channel pebble (limestone/marble)	36.4539	101.602	0.709034	3.16921	This study
Xining Basin	19R12-L	N Tribitary@ Huangshui River	River channel pebble (limestone/marble)	36.7837	101.928	0.709427	3.90518	This study
Xining Basin	19R13-L	N Tribitary@ Huangshui River	River channel pebble (limestone/marble)	36.8586	101.951	0.714147	6.32612	This study
Xining Basin	19R14-L	N Tribitary@ Huangshui River	River channel pebble (limestone/marble)	36.9865	101.879	0.715873	6.16868	This study
Xining Basin	19R50-L	S Tribitary@ Huangshui River	River channel pebble (limestone/marble)	36.438	102.037	0.708769	3.85996	This study
Xining Basin	19R51-L	N Tribitary@ Huangshui River	River channel pebble (limestone/marble)	36.5276	102.091	0.705869	3.24012	This study
Xining Basin	19R52-L	S Tribitary@ Huangshui River	River channel pebble (limestone/marble)	36.4535	102.411	0.706764	3.50648	This study
Xining Basin	19R55-L	S Tribitary@ Huangshui River	River channel pebble (limestone/marble)	36.2715	102.786	0.707732	4.48298	This study

## Sheet: S 4 
Table S4 87Sr/86Sr ratios of carbonate-free fraction of river/lake sediments in the Xining and Qaidam Basins (including Xining Basin data in Fig. 4H)
Region	Location	Sample ID	Type	Latitude	Longitude	87Sr/86Sr	1σ (×10-6)	Source
Xining Basin	Huangshui River main stream	19R05-B	modern river sediments	36.3334	102.825	0.718233	4.02651	This study
Xining Basin	N Tribitary@ Huangshui River	19R08-B	modern river sediments	36.3516	102.832	0.718842	3.49091	This study
Xining Basin	N Tribitary@ Huangshui River	19R09-B	modern river sediments	37.0675	101.574	0.716187	2.97406	This study
Xining Basin	S Tribitary@ Huangshui River	19R10-B	modern river sediments	36.4539	101.602	0.708591	2.807	This study
Xining Basin	N Tribitary@ Huangshui River	19R11-B	modern river sediments	37.0817	101.403	0.748318	6.01105	This study
Xining Basin	N Tribitary@ Huangshui River	19R12-B	modern river sediments	36.7837	101.928	0.720997	4.99807	This study
Xining Basin	N Tribitary@ Huangshui River	19R14-B	modern river sediments	36.9865	101.879	0.716234	3.82122	This study
Xining Basin	S Tribitary@ Huangshui River	19R50-B	modern river sediments	36.438	102.037	0.72072	6.37939	This study
Xining Basin	N Tribitary@ Huangshui River	19R51-B	modern river sediments	36.5276	102.091	0.729481	4.98213	This study
Xining Basin	S Tribitary@ Huangshui River	19R52-B	modern river sediments	36.4535	102.411	0.71225	3.56362	This study
Xining Basin	N Tribitary@ Huangshui River	19R53-B	modern river sediments	36.4891	102.419	0.715288	3.38441	This study
Xining Basin	S Tribitary@ Huangshui River	19R55-B	modern river sediments	36.2715	102.786	0.712041	2.45154	This study
Qaidam Basin		16H01	modern-recent river sediments	38.2912	94.6448	0.71592	3.69779	This study
Qaidam Basin		16H02	modern-recent river sediments	38.0059	95.0571	0.749073	5.49416	This study
Qaidam Basin		17H01	modern-recent river sediments	38.8667	94.3698	0.730481	6.14503	This study
Qaidam Basin		18H01	modern-recent river sediments	38.6649	95.4701	0.728586	3.91404	This study
Qaidam Basin		18H02	modern-recent river sediments	37.7929	95.3994	0.719068	3.18067	This study
Qaidam Basin		18H03	modern-recent river sediments	37.8615	95.3934	0.785982	3.89193	This study
Qaidam Basin		18H04	modern-recent river sediments	38.0621	94.7844	0.728662	8.33679	This study
Qaidam Basin		18H05	modern-recent river sediments	38.9098	93.3938	0.714767	3.47936	This study
Qaidam Basin		18H06	modern-recent river sediments	38.9098	92.654	0.712437	5.75445	This study
Qaidam Basin		18H07	modern-recent river sediments	39.0334	94.1303	0.718302	6.11973	This study
Qaidam Basin		19H-01	modern-recent river sediments	36.2412	98.1053	0.714504	5.72055	This study
Qaidam Basin		19H-02	modern-recent river sediments	35.9138	97.9957	0.715456	4.06929	This study
Qaidam Basin		19H-03	modern-recent river sediments	36.0639	97.4567	0.72437	3.62324	This study
Qaidam Basin		19H-04	modern-recent river sediments	36.1516	97.1698	0.717509	3.08774	This study
Qaidam Basin		19H-05	modern-recent river sediments	36.3803	96.4119	0.718631	3.28402	This study
Qaidam Basin		19H-06	modern-recent river sediments	36.3269	95.2935	0.720606	3.45326	This study
Qaidam Basin		19H-07	modern-recent river sediments	36.4279	94.8559	0.716208	4.44523	This study
Qaidam Basin		19H-08	modern-recent river sediments	36.4468	94.3936	0.717581	4.45116	This study
Qaidam Basin		19H-09	modern-recent river sediments	36.9339	93.0002	0.720154	4.86904	This study
Qaidam Basin		19H-10	modern-recent river sediments	37.7818	91.7141	0.720147	4.28311	This study
Qaidam Basin		19H-11	modern-recent river sediments	38.3324	90.5543	0.720085	3.2707	This study
Qaidam Basin		19H-12	modern-recent river sediments	38.1306	90.239	0.719519	5.91942	This study
Qaidam Basin		19H-13	modern-recent river sediments	37.3491	96.925	0.7274	7.63411	This study
Qaidam Basin		19H-14	modern-recent river sediments	37.3367	97.3715	0.726579	6.57366	This study
Qaidam Basin		19R56-B	modern-recent river sediments	37.3367	97.3715	0.726733	4.58399	This study
Qaidam Basin		19R58-B	modern-recent river sediments	37.3367	97.3715	0.72015	4.66911	This study
Hala Lake		19R64-B	lake sediments	37.3367	97.3715	0.722529	4.27019	This study

## Sheet: S 5
Table S5 87Sr/86Sr ratios of water and acetic acid leachates of the lower HLD section sediments in the Linxia Basin
Section	Sample ID	depth (m)	Age (Ma)	87Sr/86Sr water leachate	1σ(×10-6)	87Sr/86Sr acetic acid leachate	1σ (×10-6)	Source
outcrop	1	121	5.09	0.711649	22	0.711116	5	Yang et al., 2017
outcrop	4	124	5.18	0.711678	7	0.711279	5.5	Yang et al., 2017
outcrop	29	149	6.567	0.711844	9.5	0.711229	6.5	Yang et al., 2017
outcrop	32	152	6.64	0.711711	7.5	0.711596	2.5	Yang et al., 2017
outcrop	43	163	6.9	0.711773	7	0.711622	5.5	Yang et al., 2017
outcrop	56	176	7.29	0.711275	5.5	0.711249	7	Yang et al., 2017
outcrop	62	182	7.46	0.711477	4	0.71126	10	Yang et al., 2017
outcrop	72	192	7.73	0.711091	10	0.710939	5.5	Yang et al., 2017
outcrop	78	198	7.89	0.71244	5.5	0.711316	4	Yang et al., 2017
outcrop	86	206	8.09	0.711294	6	0.711123	2.5	Yang et al., 2017
outcrop	102	222	8.4	0.709926	7.5	0.709944	4.5	Yang et al., 2017
outcrop	119	239	8.73	0.709953	5.5	0.710051	4	Yang et al., 2017
outcrop	120	240	8.77	0.710095	4.5	0.710587	6	Yang et al., 2017
outcrop	121	241	8.8	0.709966	3	0.710132	4.5	Yang et al., 2017
outcrop	131	251	9.14	0.70993	12	0.710317	4.5	Yang et al., 2017
outcrop	142	262	9.49	0.709962	10	0.709882	8.5	Yang et al., 2017
outcrop	143	263	9.49	0.710056	7.5	0.709942	5.5	Yang et al., 2017
outcrop	158	278	9.92	0.710136	6	0.710915	8.5	Yang et al., 2017
outcrop	206	326	11.28	0.710042	10.5	0.710185	6.5	Yang et al., 2017
outcrop	219	339	11.8	0.710031	4.5	0.710683	5.5	Yang et al., 2017
HZ drilling	3	350	12.301	0.710088	10	0.71008	4.97703	This study
HZ drilling	29	376	13.0123	0.710107	15	0.709912	7	This study
HZ drilling	56	403	13.54			0.710308	4	This study
HZ drilling	86	433	13.885	0.710207	16.6894	0.710182	3.41438	This study
HZ drilling	106	453	14.084	0.710399	16	0.710398	5	This study
HZ drilling	136	483	14.39			0.710367	5	This study
HZ drilling	163	510	14.8088	0.710357	15	0.710492	5	This study
HZ drilling	222	569	16.89	0.710418	15	0.710466	3	This study
HZ drilling	260	607	17.9	0.71041	11.2907	0.710438	7	This study
HZ drilling	293	640	18.73	0.71043	14	0.710375	3.81661	This study
HZ drilling	318	665	19.36	0.710411	8	0.710365	4.09984	This study
HZ drilling	346	693	20.03	0.710354	10	0.710355	2.93385	This study
HZ drilling	379	726	20.801	0.710355	11.0632	0.710029	8	This study
HZ drilling	400	747	21.235	0.71026	14	0.71006	5.08907	This study
HZ drilling	430	777	21.84	0.710028	18	0.710255	5	This study
HZ drilling	463	810	22.65	0.709847	12	0.709791	4.28395	This study
HZ drilling	479	826	23.1269	0.709719	12	0.709759	4.49131	This study

## Sheet: S 6
Table S6 87Sr/86Sr ratios of water and acetic acid leachates of the XJ section sediments in the Xining Basin
Section	Sample ID	Age (Ma)	87Sr/86Sr water leachate	1σ (×10-6)	87Sr/86Sr acetic acid leachate	1σ (×10-6)	Source
XN drilling	1	12.95			0.711154	2.08908	This study
XN drilling	9	13.26			0.711218	3.18008	This study
XN drilling	19	13.6465			0.711146	2.29334	This study
XN drilling	29	14.0315	0.7112	5.32622	0.712139	3.20746	This study
XN drilling	39	14.4165			0.711318	3.17984	This study
XN drilling	49	14.7677	0.711136	5.09493	0.711056	6.51867	This study
XN drilling	59	15.0852			0.711063	3.15942	This study
XN drilling	69	15.4026			0.711682	6.27642	This study
XN drilling	79	15.72	0.711337	6.36731	0.712347	7.99422	This study
XN drilling	89	16.0207			0.711249	7.89152	This study
XN drilling	102	16.3242			0.71114	2.34592	This study
XN drilling	110	16.5109			0.711075	2.08908	This study
XJ section	814.2	16.641	0.711251	6	0.710948	5	This study
XN drilling	120	16.7433			0.711175	4.57909	This study
XN drilling	130	16.9668			0.71118	3.2342	This study
XN drilling	139	17.168			0.710984	2.45394	This study
XN drilling	150	17.4174			0.710865	3.69165	This study
XN drilling	159	17.6227			0.710898	4.02657	This study
XN drilling	170	17.8736			0.711031	7.83963	This study
XJ section	782	18.0277	0.711201	8	0.710866	5	This study
XN drilling	180	18.1016	0.711114	2.75951	0.711061	3.16654	This study
XN drilling	190	18.3297			0.710932	2.29729	This study
XJ section	758.1	19.057	0.711141	4	0.710877	3	This study
XJ section	728	20.3533	0.711336	5	0.710869	8	This study
XJ section	702.5	21.4515	0.711301	6	0.710924	5	This study
XJ section	664.1	23.1052	0.711476	5.95033	0.711051	6	This study
XJ section	637.9	24.2335	0.711458	6	0.711402	7	This study
XJ section	607.9	25.5255	0.711606	9	0.711144	6.25548	This study
XJ section	589.9	26.3007			0.711154	5	This study
XJ section	559.9	27.5926			0.710999	4.05116	This study
XJ section	508.1	29.8234	0.711275	4.79696	0.71105	3.57545	This study
XJ section	486	30.7087	0.711139	6	0.710697	6.71113	This study
XJ section	462.1	31.6496	0.711021	9	0.710549	5.23326	This study
XJ section	441.9	32.4449	0.710594	5	0.710255	3.60272	This study
XJ section	423.9	33.1535	0.71085	5	0.71046	3.59499	This study
XJ section	397.9	34.1772	0.710843	4	0.710267	5.33055	This study
XJ section	379.9	34.8858	0.71079	6	0.71039	5.27088	This study
XJ section	355	35.8661	0.710596	5.32668	0.710016	5.05232	This study
XJ section	323.9	37.0906			0.710419	5.74032	This study
XJ section	304.8	37.8386	0.711	8	0.710865	4.6831	This study
XJ section	264.1	39.4449	0.711149	2.78527	0.71092	7.14024	This study
XJ section	240	40.5769	0.711076	7	0.711072	3.68222	This study
XJ section	222.1	41.6247	0.711355	8	0.710915	2.84999	This study
XJ section	206	42.6818			0.711751	4.8217	This study
XJ section	188	43.8636	0.71226	7	0.711403	3.39617	This study
XJ section	164.1	45.4328			0.71091	7.56761	This study
XJ section	144	46.7525	0.710443	5	0.710775	4.43541	This study
XJ section	126	47.9343	0.711498	8.39422	0.710979	3.76113	This study
XJ section	108	48.6071			0.710932	4.57788	This study
XJ section	87.5	49.3393	0.711596	6	0.71125	3.93493	This study
XJ section	68	50.0548	0.710964	2.19484	0.710769	7.09945	This study
XJ section	46	51.2613	0.712097	7.19721	0.71212	4.24151	This study

## Sheet: S 7
Table S7 87Sr/86Sr ratios of water and acetic acid leachates of the GJS section sediments in the Xining Basin
Sample ID	Depth (m)	Age (Ma)	87Sr/86Sr water leachate	1σ (×10-6)	87Sr/86Sr acetic acid leachate	1σ (×10-6)	Source
GJS-b 45	699	13.566	0.711402	4.33076	0.711438	3.85294	This study
GJS-b 39.5	693.5	13.9288	0.711593	29	0.712131	2	This study
GJS-b 31.9	685.9	14.4302	0.711557	21	0.71262	2	This study
GJS-b 23.3	677.3	14.9976	0.71145	27	0.711562	3	This study
GJS-b 15.9	669.9	15.4858	0.711683	42	0.711496	2	This study
GJS-b 8.8	662.8	15.9542	0.711304	25	0.711019	2	This study
GJS-b 5	659	16.0465	0.71165	2.93075	0.712069	4.50763	This study
GJS-b 0.9	654.9	16.1314	0.711394	10	0.712022	2	This study
GJS 651.2	651.2	16.208	0.711782	46	0.712263	10	This study
GJS 647.8	647.8	16.2784			0.711797	2	This study
GJS 641.3	641.3	16.413			0.711487	3	This study
GJS 635.7	635.7	16.529	0.711566	35	0.711529	2	This study
GJS 624.7	624.7	16.757	0.71161	31	0.711468	2	This study
GJS 613.9	613.9	16.98			0.711551	2	This study
GJS 604.9	604.9	17.167			0.711768	9	This study
GJS 594.7	594.7	17.473			0.711904	11	This study
GJS 584.9	584.9	17.81			0.712306	14	This study
GJS-582.4	582.4	17.8959	0.71193	3.59636	0.712591	2.58414	This study
GJS 574.3	574.3	18.175	0.711715	15	0.712008	12	This study
GJS 566.7	566.7	18.436			0.712058	12	This study
GJS 552.8	552.8	18.907	0.71217	20	0.711392	12	This study
GJS 546.7	546.7	19.104			0.711442	12	This study
GJS 535.3	535.3	19.473	0.712229	19	0.711824	10	This study
GJS 523.7	523.7	19.852	0.712185	15	0.711675	14	This study
GJS 503.8	503.8	20.518	0.712053	18	0.711323	7	This study
GJS 490.6	490.6	20.9599	0.712042	4.14489	0.7112	1.73253	This study
GJS 484.3	484.3	21.171	0.712039	15	0.711784	11	This study
GJS 464.3	464.3	21.84			0.711366	12	This study
GJS 445.8	445.8	22.704	0.711845	12	0.71118	2	This study
GJS 437	437	23.3774	0.711705	3.69524	0.711246	2.80059	This study
GJS 423.8	423.8	24.387	0.711739	13	0.711217	2	This study
GJS-412.3	412.3	25.1901	0.711443	3.1285	0.711061	3.43602	This study
GJS 406.3	406.3	25.439	0.711864	22	0.711253	2	This study
GJS 377.2	377.2	26.644	0.711151	15	0.710753	10	This study
GJS 366	366	27.1077	0.711529	4.59053	0.710963	3.14026	This study
GJS 352.8	352.8	27.64			0.710999	10	This study
GJS 325.2	325.2	28.707	0.711348	11	0.71108	9	This study
GJS 299.6	299.6	29.6965	0.711573	3.85432	0.711333	2.75134	This study
GJS 284.8	284.8	30.269	0.711491	6	0.711106	10	This study
GJS 270.6	270.6	30.8175	0.71122	3.0622	0.710974	2.24588	This study
GJS 270.1	270.1	30.837	0.711272	20	0.710883	2	This study
GJS 240.9	240.9	31.781	0.710916	9	0.710802	12	This study
GJS 219.4	219.4	32.4473	0.711117	3.04389	0.710643	4.65712	This study
GJS 207.3	207.3	32.822			0.710116	11	This study
GJS 180.8	180.8	33.8	0.710999	57	0.71033	8	This study
GJS 174	174	34.0783	0.710903	2.56651	0.710446	2.68204	This study
GJS 157.3	157.3	34.762	0.710664	14	0.710204	11	This study
GJS 130.9	130.9	35.836	0.711332	15	0.710456	2	This study
GJS 124.7	124.7	36.08	0.710952	4.17344	0.71047	3.77111	This study
GJS 106.8	106.8	36.774	0.710694	14	0.710582	11	This study
GJS 80.5	80.5	37.798	0.711607	17	0.711582	8	This study
GJS 53.8	53.8	38.837	0.711139	13	0.711045	12	This study
GJS 41.4	41.4	39.3199	0.711155	1.52505	0.7106	1.74365	This study
GJS 24.4	24.4	39.982	0.710736	20	0.711233	2	This study
GJS 19.1	19.1	40.31	0.711335	3.76149	0.711328	1.53027	This study
GJS 15.2	15.2	40.901	0.711157	18	0.711143	11	This study
GJS 6.2	6.2	42.26	0.711273	4.6289	0.710996	4.02394	This study

## Sheet: S 8
Table S8 87Sr/86Sr ratios of acetic acid leachates of the LMS section sediments in the Tianshui Basin
Sample ID	Depth (m)	Age (Ma)	87Sr/86Sr water leachate	1σ (×10-6)	Source
LM-59	13.8	2.7	0.711701	3.26441	This study
LM-39	40.1	3	0.711744	3.06313	This study
LM-30	51.9	3.1	0.711642	3.79467	This study
LM-19	66.4	3.3	0.711883	2.92355	This study
LM-10	78.2	3.46	0.712012	6.73849	This study
LM-5	84.7	3.54	0.711712	4.41748	This study
LM-1	90	3.6	0.712164	4.84422	This study
WZ-0	90.95	3.7	0.711819	5.38219	This study
WZ-10	100.5	4	0.711596	4.20069	This study
WZ-21	111	4.3	0.711809	3.60417	This study
WZ-29	118	4.5	0.712202	4.17466	This study
LM2-12	149.5	5.8	0.71162	3.78588	This study
LM2-20	158.6	6	0.711517	3.96174	This study
LM2-32	172.1	6.3	0.711617	4.26522	This study
LM2-40	181.2	6.5	0.711612	3.79501	This study
LM2-50	191.5	6.8	0.711557	3.01104	This study
LM2-61	204.9	7.1	0.711522	3.24156	This study
LM2-68	212.8	7.3	0.711542	2.68793	This study
LM2-79	225.2	7.5	0.711492	4.06613	This study
LM2-90	237.7	7.8	0.711468	4.71032	This study
LM2-99	247.8	8	0.711506	1.94365	This study
LM2-110	260.2	8.2	0.71155	4.279	This study
LM2-120	271.5	8.45	0.711604	2.63248	This study
LM2-131	284	8.7	0.711559	3.74345	This study
LM2-141	295	8.9	0.711458	2.63496	This study
LM2-150	305.5	9.1	0.711371	3.06269	This study
GQ-10.5	311	9.2	0.711174	2.3969	This study
GQ-20	320.5	9.4	0.711176	3.41875	This study
GQ-31	331.5	9.7	0.711065	2.6917	This study
GQ-40	340.5	9.9	0.710989	3.26901	This study
GQ-50	350.5	10.1	0.710949	3.94403	This study
GQ-61	361.5	10.4	0.710935	3.68152	This study
GQ-80	380.5	10.8	0.711129	2.26078	This study
GQ-86	386.5	11	0.710919	2.35019	This study
GQ-90	390.5	11.1	0.710908	3.2419	This study

## Sheet: S 9
Table S9 Nd isotopes of carbonate-free sediments of the GJS section in the Xining Basin
Sample ID	Age (Ma)	143Nd/144Nd	1σ (×10-6)	εNd (0)	Source
GJS-b 45	13.566	0.512126	4.21816	-9.99798	This study
GJS 5	16.0465	0.512101	3.32334	-10.4726	This study
GJS 582.4	17.8959	0.512049	5.03651	-11.5124	This study
GJS 490.6	20.9599	0.51212	3.1014	-10.1109	This study
GJS 437	23.3774	0.512136	4.33029	-9.82807	This study
GJS 412.3	25.1901	0.512136	5.841	-9.78778	This study
GJS 366	27.1077	0.512136	3.5003	-9.80417	This study
GJS 299.6	29.6965	0.512183	5.7618	-8.86994	This study
GJS 270.6	30.8175	0.512165	3.30915	-9.22734	This study
GJS 219.4	32.4473	0.512162	4.07639	-9.29893	This study
GJS 174	34.0783	0.512096	4.81299	-10.5856	This study
GJS 124.7	36.08	0.512086	3.04351	-10.7696	This study
GJS 41.4	39.3199	0.512076	4.54226	-10.9851	This study
GJS 19.1	40.31	0.512077	5.0797	-10.9524	This study
GJS 6.2	42.26	0.512084	2.94819	-10.8295	This study

[truncated: 7 more sheets: S10, S11, S12, S13, S14, S15, S16]
